# Supplementary material for: Genomic landscape of TP53-mutated myeloid malignancies
Source: bioRxiv or medRxiv preprint supplement (doi:10.1101/2023.01.10.23284322), 2023-01-11

**A**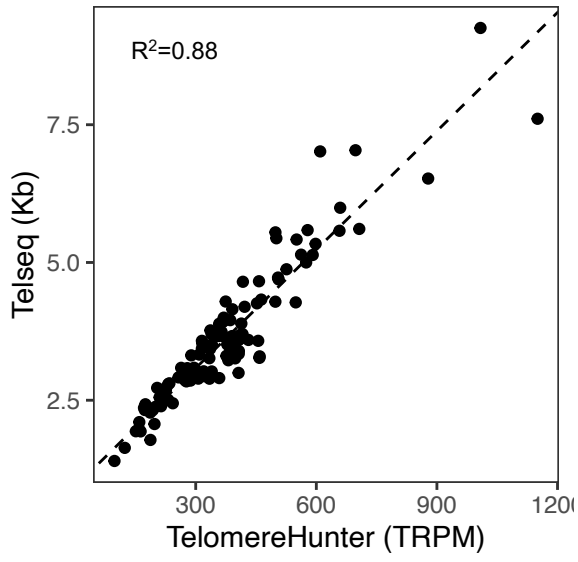**B**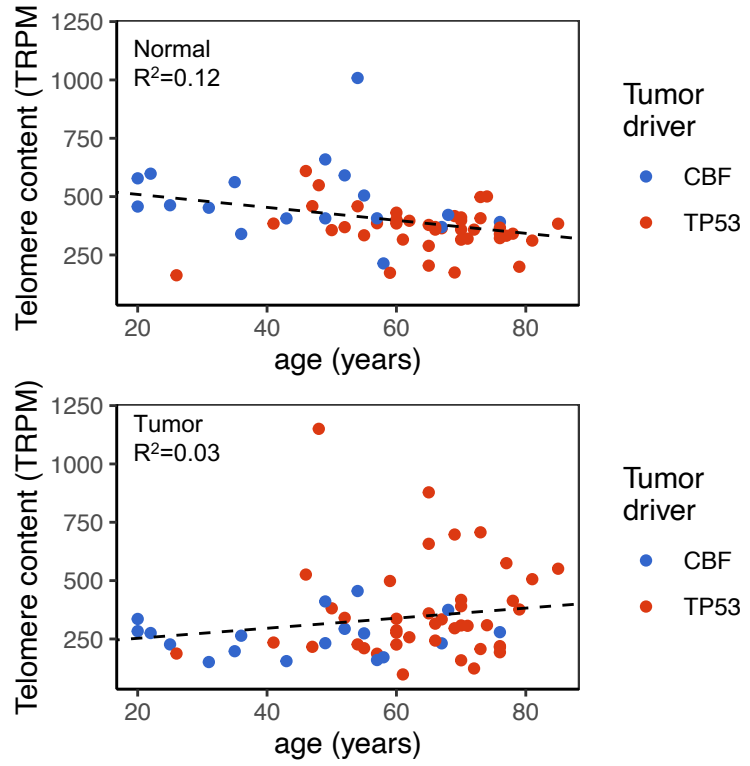

Supplement: Supplementary file [file media-4.pdf]
